# Supplementary material for: MYC drives aggressive prostate cancer by disrupting transcriptional pause release at androgen receptor targets
Source: PubMed Central journal article supplement (PMC9106722; doi:10.1038/s41467-022-30257-z), 2022-05-13
Supplement: 41467_2022_30257_MOESM1_ESM.pdf [file 41467_2022_30257_MOESM1_ESM.pdf]

## Supplementary Information

### MYC drives aggressive prostate cancer by disrupting transcriptional pause release at androgen receptor targets

Xintao Qiu<sup>1,2,†</sup>, Nadia Boufaied<sup>3,†</sup>, Tarek Hallal<sup>3,4</sup>, Avery Feit<sup>1,2</sup>, Anna de Polo<sup>3,5</sup>, Adrienne M. Luoma<sup>6</sup>, Walaa Alahmadi<sup>3,7</sup>, Janie Larocque<sup>3,7</sup>, Giorgia Zadra<sup>8,9</sup>, Yingtian Xie<sup>1,2</sup>, Shengqing Gu<sup>1,2,10</sup>, Qin Tang<sup>1,2,10</sup>, Yi Zhang<sup>1,10</sup>, Sudeepa Syamala<sup>1</sup>, Ji-Heui Seo<sup>2</sup>, Connor Bell<sup>2</sup>, Edward O'Connor<sup>2</sup>, Yang Liu<sup>11</sup>, Edward M. Schaeffer<sup>12</sup>, R. Jeffrey Karnes<sup>13</sup>, Sheila Weinmann<sup>14</sup>, Elai Davicioni<sup>11</sup>, Colm Morrissey<sup>15</sup>, Paloma Cejas<sup>1,2</sup>, Leigh Ellis<sup>16,17,18</sup>, Massimo Loda<sup>19</sup>, Kai W. Wucherpennig<sup>6</sup>, Mark M. Pomerantz<sup>2</sup>, Daniel E. Spratt<sup>20</sup>, Eva Corey<sup>15</sup>, Matthew L. Freedman<sup>1,2,21</sup>, X. Shirley Liu<sup>1,10</sup>, Myles Brown<sup>1,2</sup>, Henry W. Long<sup>1,2,‡,\*</sup>, David P. Labbé<sup>3,4,5,7,‡,\*</sup>

<sup>1</sup>Center for Functional Cancer Epigenetics, Dana-Farber Cancer Institute, Boston, MA, USA

<sup>2</sup>Department of Medical Oncology, Dana-Farber Cancer Institute, Harvard Medical School, Boston, MA, USA

<sup>3</sup>Cancer Research Program, Research Institute of the McGill University Health Centre, Montréal, Québec, Canada

<sup>4</sup>Department of Anatomy and Cell Biology, McGill University, Montréal, Québec, Canada

<sup>5</sup>Division of Urology, Department of Surgery, McGill University, Montréal, Québec, Canada

<sup>6</sup>Department of Cancer Immunology and Virology, Dana-Farber Cancer Institute, Harvard Medical School, Boston, MA, USA

<sup>7</sup>Division of Experimental Medicine, Department of Medicine, McGill University, Montréal, Québec, Canada

<sup>8</sup>Departments of Oncologic Pathology and Pathology, Dana-Farber Cancer Institute and Brigham's Women Hospital, Boston, MA, USA

<sup>9</sup>Institute of Molecular Genetics, Research National Council, Pavia, Italy

<sup>10</sup>Department of Data Science, Dana-Farber Cancer Institute, Harvard T.H. Chan School of Public Health, Boston, MA, USA

<sup>11</sup>Decipher Biosciences, San Diego, CA, USA

<sup>12</sup>Department of Urology, Northwestern University, Chicago, IL, USA

<sup>13</sup>Department of Urology, Mayo Clinic, Rochester, MN, USA

<sup>14</sup>Center for Health Research, Kaiser Permanente Northwest, Portland, OR, USA

<sup>15</sup>Department of Urology, University of Washington, Seattle, WA, USA

<sup>16</sup>Division of Medical Oncology, Department of Medicine, Cedars-Sinai Medical Center, Los Angeles, CA, USA

<sup>17</sup>Cedars-Sinai Samuel Oschin Comprehensive Cancer Institute, Los Angeles, CA, USA

<sup>18</sup>Center for Bioinformatics and Functional Genomics, Department of Biomedical Sciences, Cedars-Sinai Medical Center, Los Angeles, CA 90048, USA

<sup>19</sup>Department of Pathology and Laboratory Medicine, Weil Cornell Medicine, New York Presbyterian-Weill Cornell Campus, New York, NY, USA

<sup>20</sup>Department of Radiation Oncology, University Hospitals Seidman Cancer Center, Case Western Reserve University School of Medicine, Cleveland, OH, USA

<sup>21</sup>The Eli and Edythe L. Broad Institute, Cambridge, MA, USA

<sup>†</sup>These authors contributed equally

<sup>‡</sup>These authors jointly supervised this work

\*E-Mail: [henry\\_long@dfci.harvard.edu](mailto:henry_long@dfci.harvard.edu) (H.W.L.), [david.labbe@mcgill.ca](mailto:david.labbe@mcgill.ca) (D.P.L.)

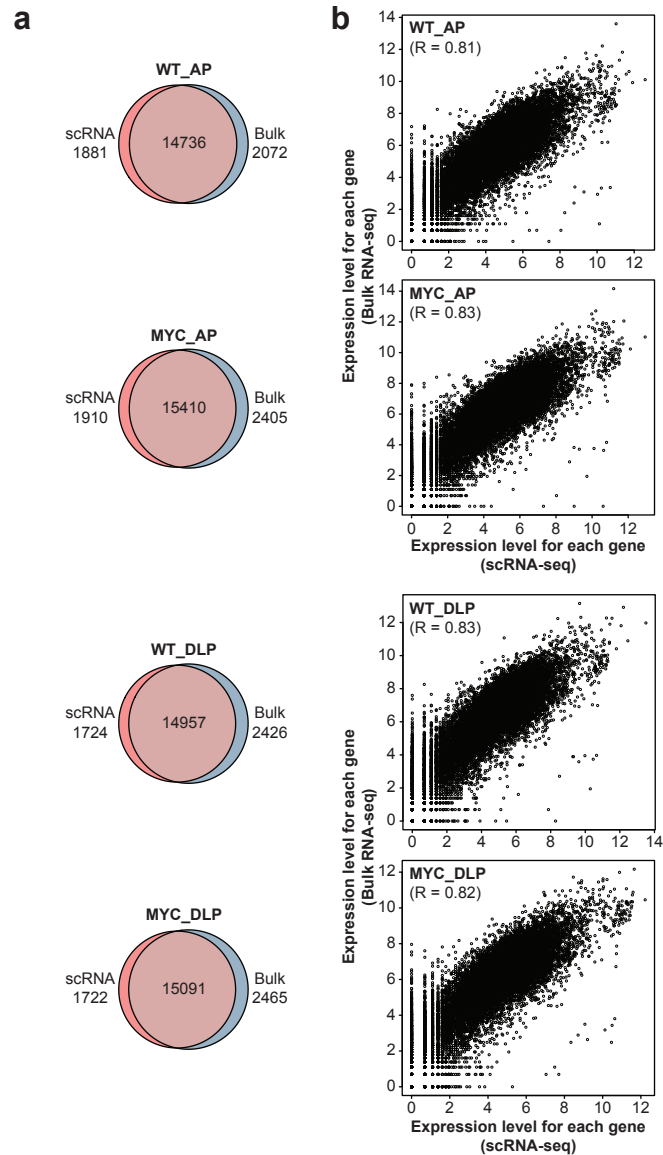

**Supplementary Figure 1: Single-cell transcriptome is highly correlated with bulk gene expression in AP and DLP lobes. (a, b)** Transcriptional profiling of WT and MYC-transformed AP and DLP lobes reveals high concordance for the total number of genes detected **(a)** and their expression levels **(b)** between bulk and single-cell RNA-seq (AP, DLP; matched bulk and single-cell RNA-seq;  $n = 1$  per genotype). WT: wild-type; AP: anterior prostate; DLP: dorsolateral prostate.

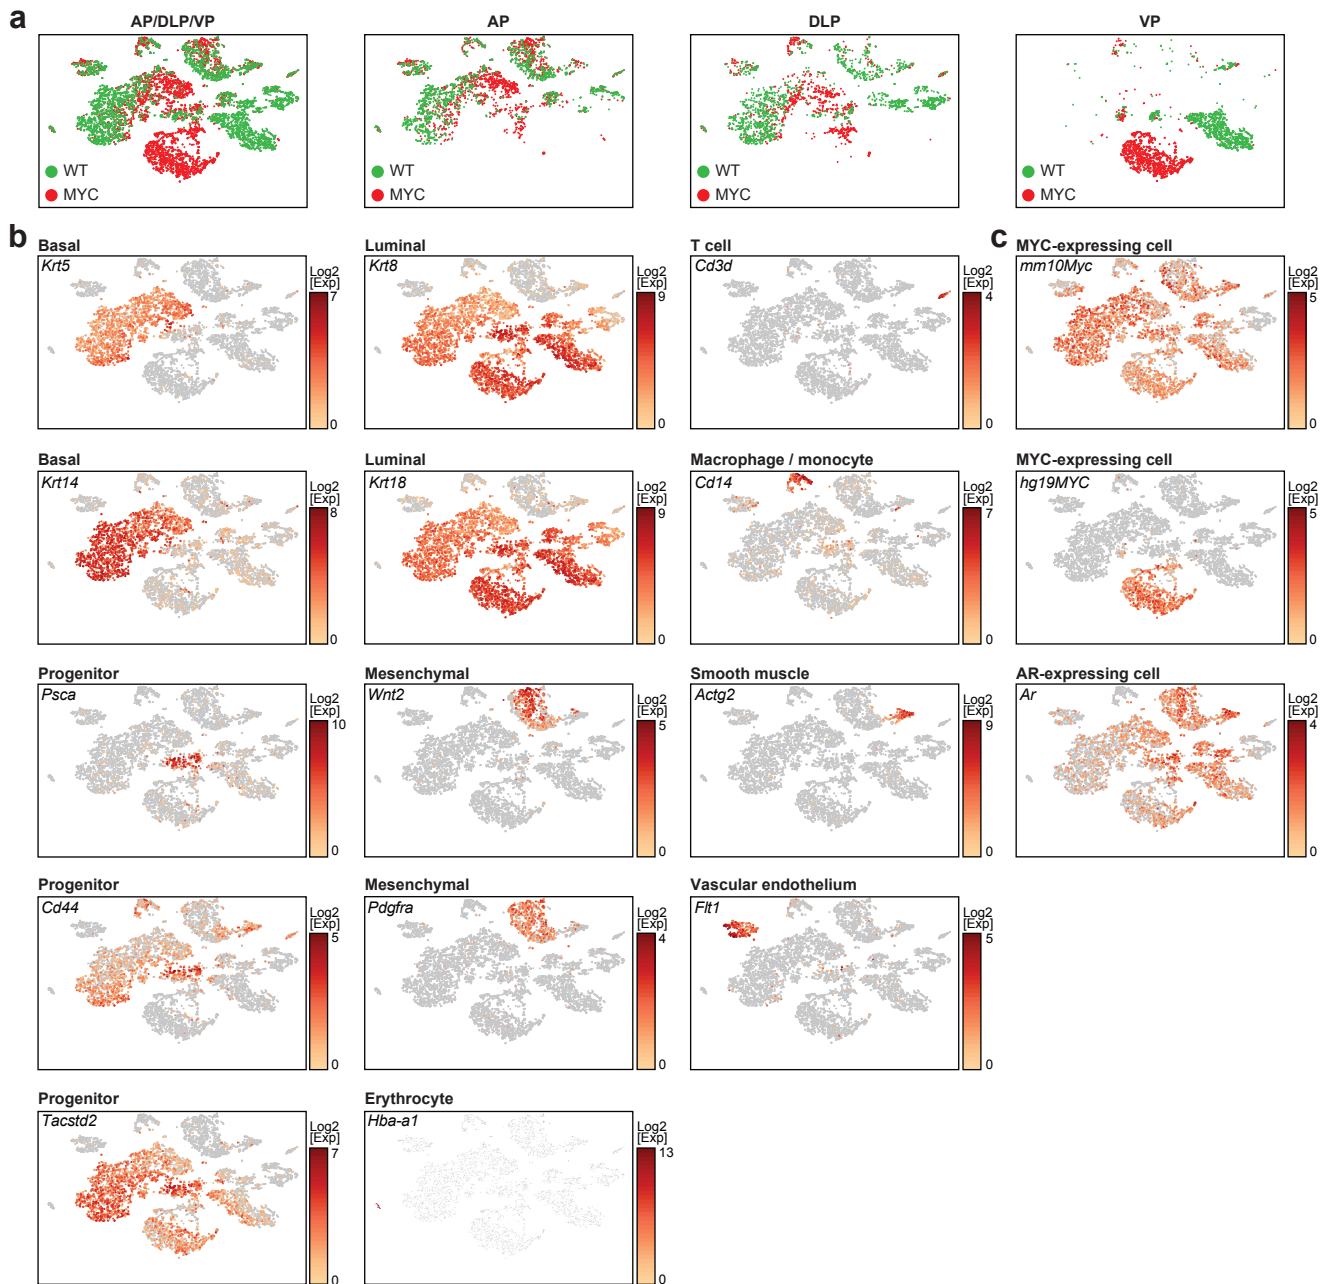

**Supplementary Figure 2: Molecular characterization of murine WT and MYC-transformed prostate lobes.** (a) Single-cell census of WT and MYC-transformed AP, DLP and VP. tSNE of scRNA-seq profiles (as in **Figure 2a**), colored by genotype (AP, DLP, VP;  $n = 1$  per genotype). (b, c) Expression of selected markers of different subsets (b; AP, DLP, VP;  $n = 1$  per genotype) as well as murine *Myc* (*mm10Myc*), human *MYC* (*hg19MYC*) and the *Ar* (c; AP, DLP, VP;  $n = 1$  per genotype). WT: wild-type; VP: ventral prostate; DLP: dorsolateral prostate; AP: anterior prostate.

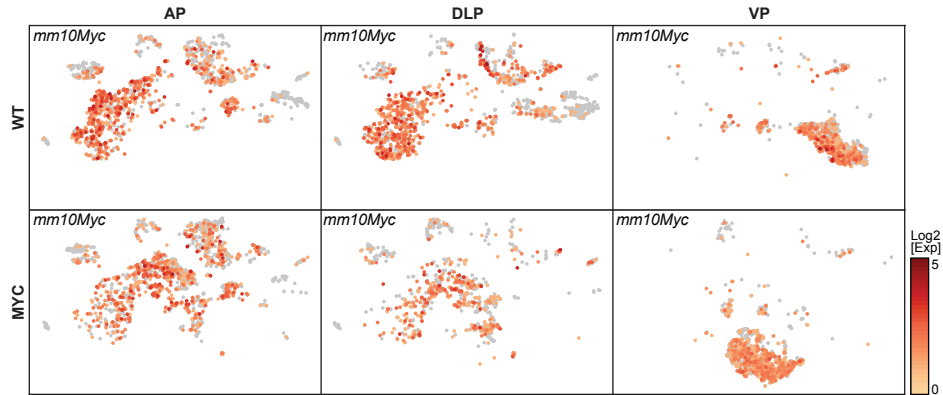

**Supplementary Figure 3: Murine Myc is expressed across cell subpopulations and prostate lobes.** Expression of murine *Myc* (*mm10Myc*) in WT and MYC-transformed AP, DLP and VP (AP, DLP, VP;  $n = 1$  per genotype). WT: wild-type; AP: anterior prostate; DLP: dorsolateral prostate; VP: ventral prostate.

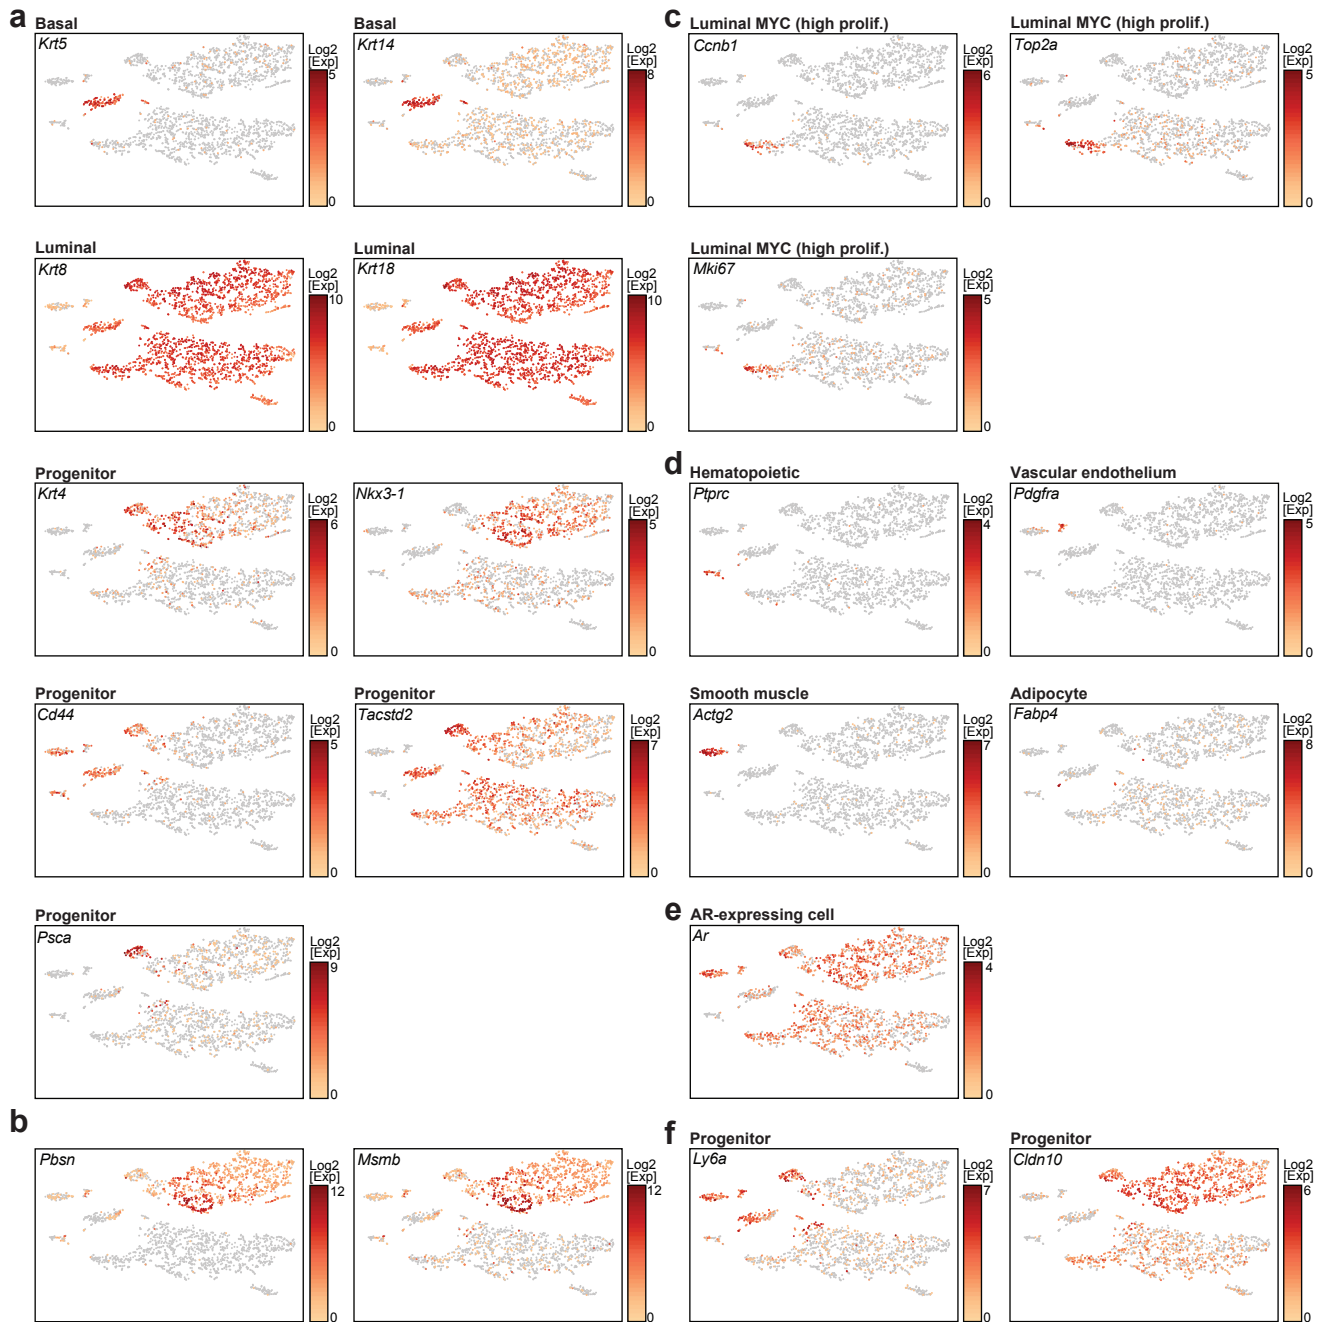

**Supplementary Figure 4: Molecular characterization of murine WT and MYC-transformed VP.** (a-f) Expression of selected markers of different subsets (VP;  $n = 1$  per genotype). WT: wild-type; VP: ventral prostate.

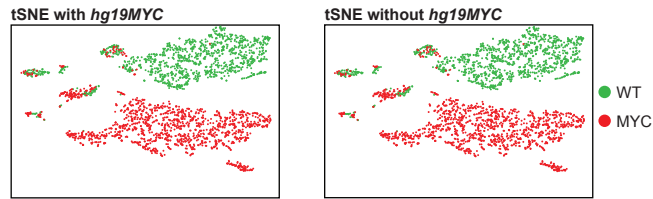

**Supplementary Figure 5: tSNE of scRNA-seq profiles is not affected by the inclusion of human *MYC* transcript.** tSNE of VP generated with (*left*) or without (*right*) the inclusion of human *MYC* (*hg19MYC*; VP;  $n = 1$  per genotype). WT: wild-type; VP: ventral prostate.

**a**

**FOXA1 ChIP-seq binding motif**  
FOXA1(Forkhead)/LNCAP-FOXA1-ChIP-seq(GSE27824)/Homer  
  
WT\_1:  $P = 1e-690$   
WT\_2:  $P = 1e-738$   
MYC\_1:  $P = 1e-769$   
MYC\_2:  $P = 1e-823$

**b**

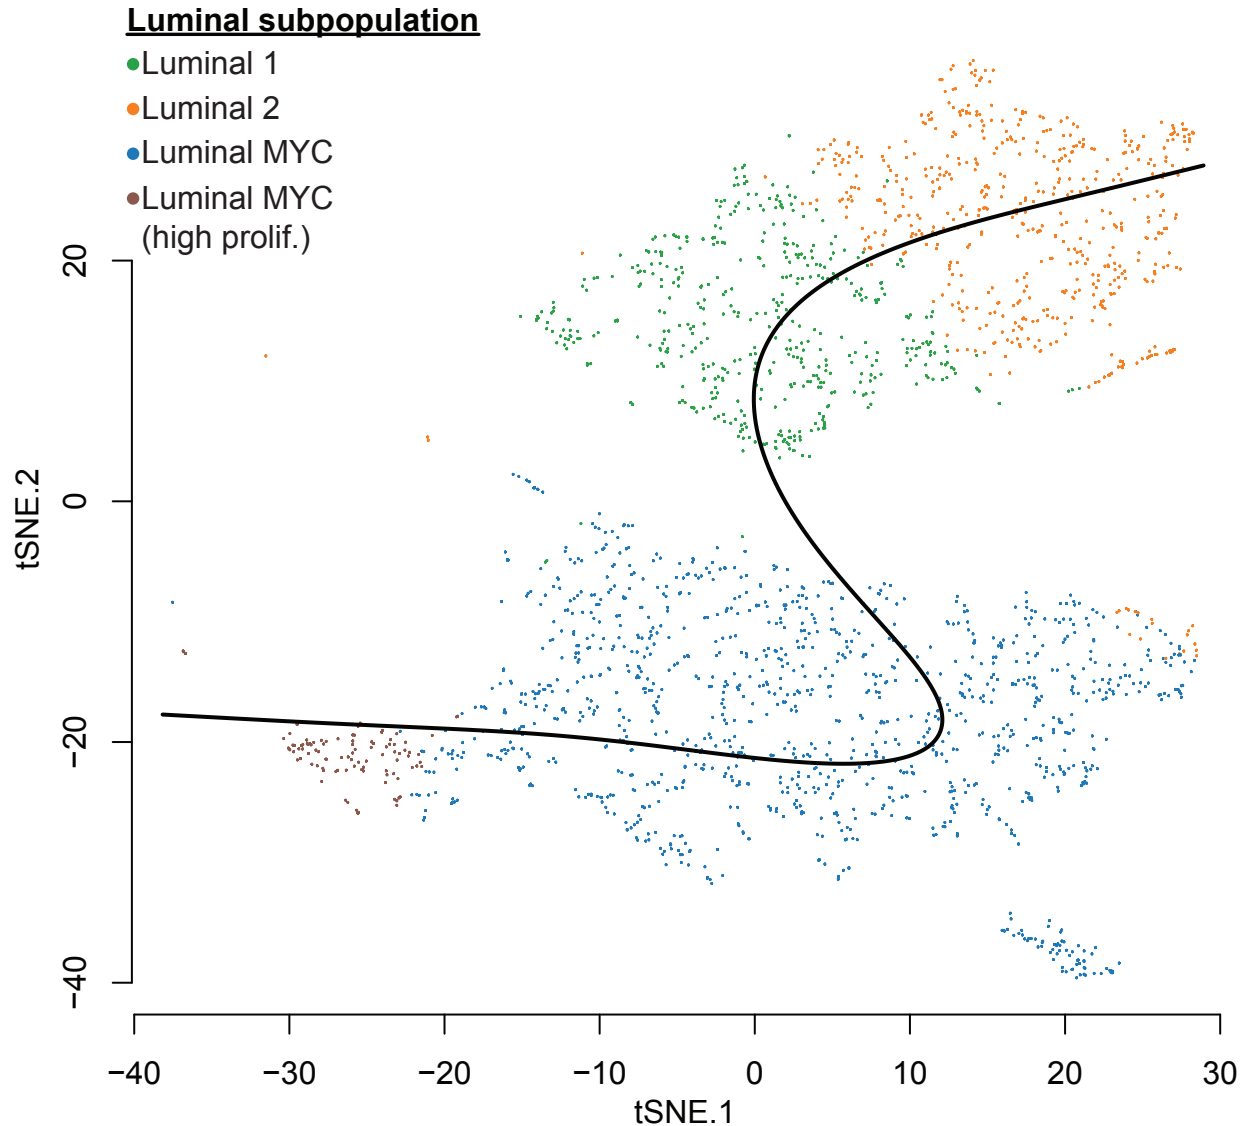

**Supplementary Figure 6: Integration of ChIP-seq with scRNA-seq.** (a) FOXA1 ChIP-seq identifies FHRE as the top FOXA1 binding motif in WT and MYC-transformed VP (VP;  $n = 2$  pools of biological replicates ( $n = 8-13$ ) per genotype). (b) Slingshot pseudotime inference used to order luminal cells in **Figure 4g** (VP;  $n = 1$  per genotype). WT: wild-type; VP: ventral prostate; FHRE: forkhead response element.

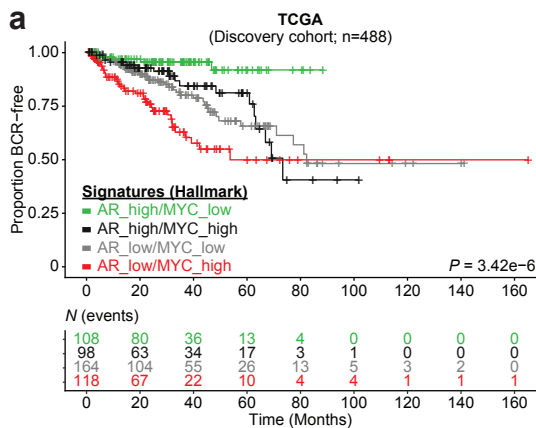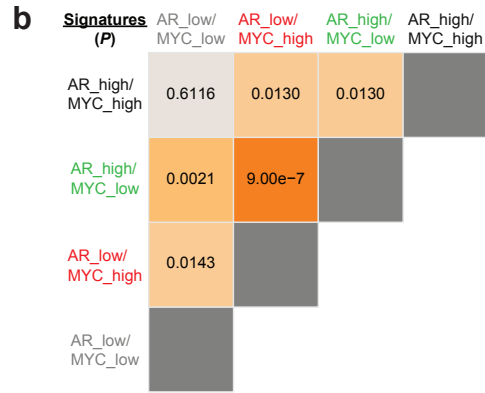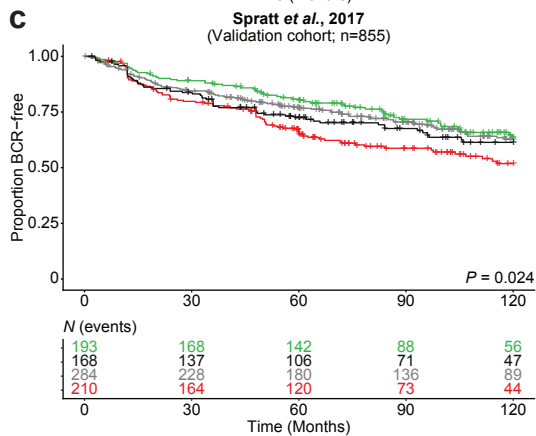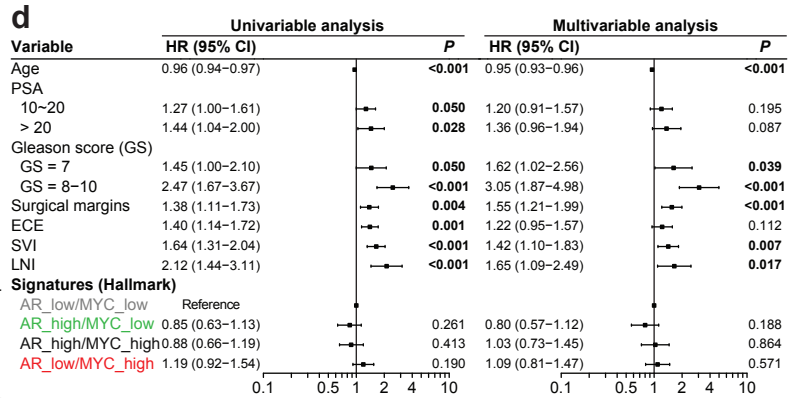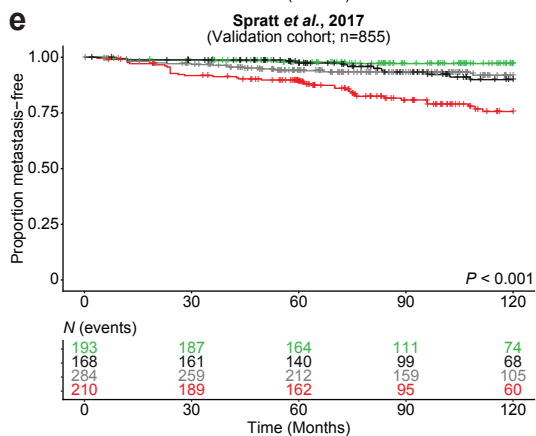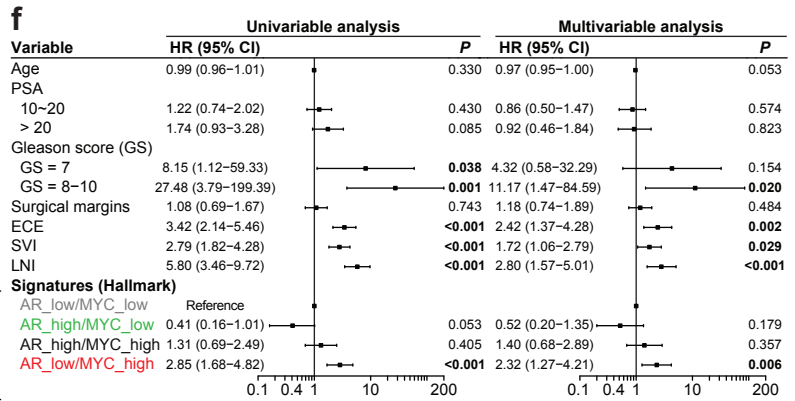

**Supplementary Figure 7: Divergent MYC and AR transcriptional programs dictate disease progression.** (a, b) Kaplan-Meier curves (a) and log-rank tests (b) reveal that patients bearing a primary tumor characterized by low AR transcriptional signature (Hallmark) and concurrent high MYC transcriptional signature (Hallmark) have a shorter time to biochemical recurrence (BCR) within the discovery cohort (TCGA). (c, d) Kaplan-Meier curves (c) but not univariable and multivariable analysis (d; Cox proportional hazards model) confirms that tumors with concurrent low AR and high MYC transcriptional signatures have a significant more rapid development of BCR than tumors with low AR transcriptional signature without an active MYC transcriptional program in the validation cohort (Spratt *et al.*, 2017<sup>1</sup>;  $n = 855$ ; HR  $\pm$  95% CI). (e, f) Kaplan-Meier curves (e), univariable and multivariable analyses (f; Cox proportional hazards model) reveal that tumors with concurrent low AR and high MYC transcriptional signatures are more likely to develop metastatic disease ( $n = 855$ ; HR  $\pm$  95% CI). PSA: prostate-specific antigen; HR: hazard ratio; CI: confidence interval; GS: Gleason score; ECE: extracapsular extension; SVI: seminal vesicles invasion; LNI: lymph node involvement.



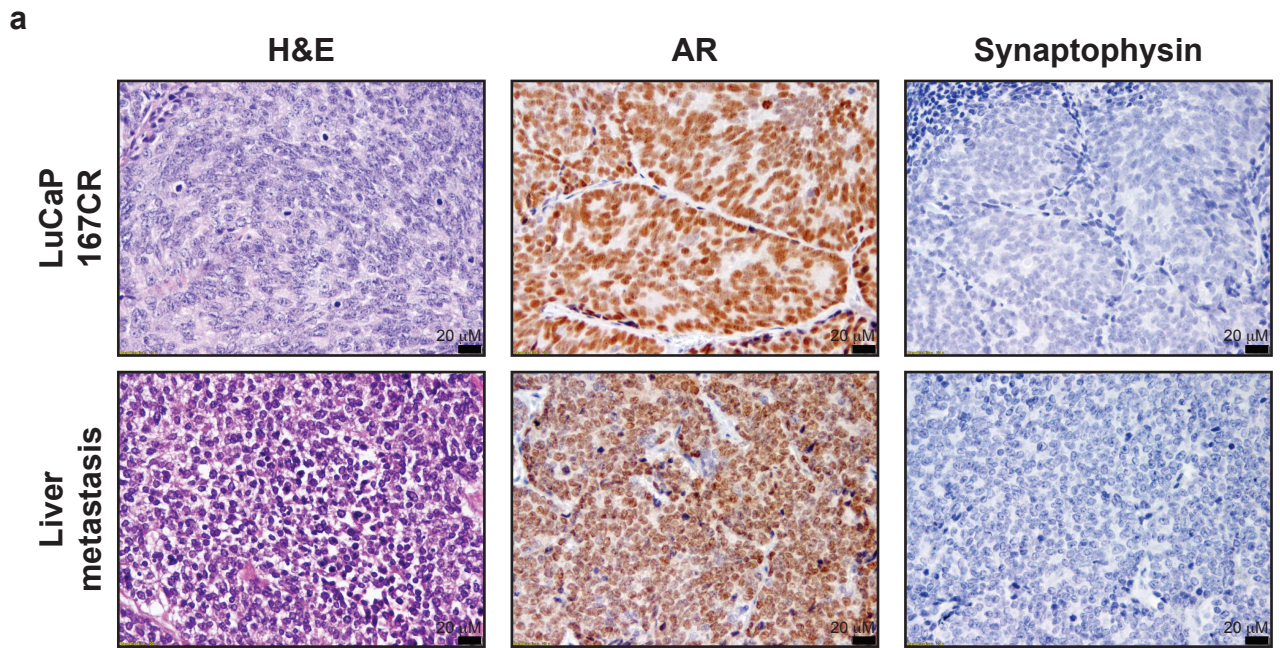

**b** AR ChIP-seq binding motif  
 ARE(NR)/LNCAP-AR-ChIP-seq(GSE27824)/Homer

AGAACAATGTTCTT

| MYC-low |        | MYC-high |         |
|---------|--------|----------|---------|
| PDX     | P      | PDX      | P       |
| 105CR   | 1e-673 | 167CR    | 1e-1322 |
| 136CR   | 1e-628 | 70CR     | 1e-706  |
| 147CR   | 1e-318 | 78CR     | 1e-666  |
| 96CR    | 1e-327 | 81CR     | 1e-641  |

**c** FOXA1 ChIP-seq binding motif  
 FOXA1(Forkhead)/LNCAP-FOXA1-ChIP-seq  
 (GSE27824)/Homer

AAAGTAAACA

| MYC-low |        | MYC-high |        |
|---------|--------|----------|--------|
| PDX     | P      | PDX      | P      |
| 105CR   | 1e-729 | 167CR    | 1e-693 |
| 136CR   | 1e-801 | 70CR     | 1e-869 |
| 147CR   | 1e-916 | 78CR     | 1e-558 |
| 96CR    | 1e-764 | 81CR     | 1e-658 |

**Supplementary Figure 8: mCRPC LuCaP patient-derived xenograft (PDX) 167CR characterization and top binding motifs in LuCaP PDXs AR and FOXA1 ChIP-seq.** (a) LuCaP PDX 167CR was established from a liver metastasis of a male who died of abiraterone-, carboplatin- and docetaxel-resistant CRPC. LuCaP 167CR expresses AR, responds to castration and is negative for synaptophysin. Morphology of the PDX was concordant with the original liver metastasis (b, c) AR and FOXA1 ChIP-seq identifies ARE (b) and FHRE (c), respectively as the top binding motif in mCRPC LuCaP PDXs. ARE: androgen response element; FHRE: forkhead response element.

**a**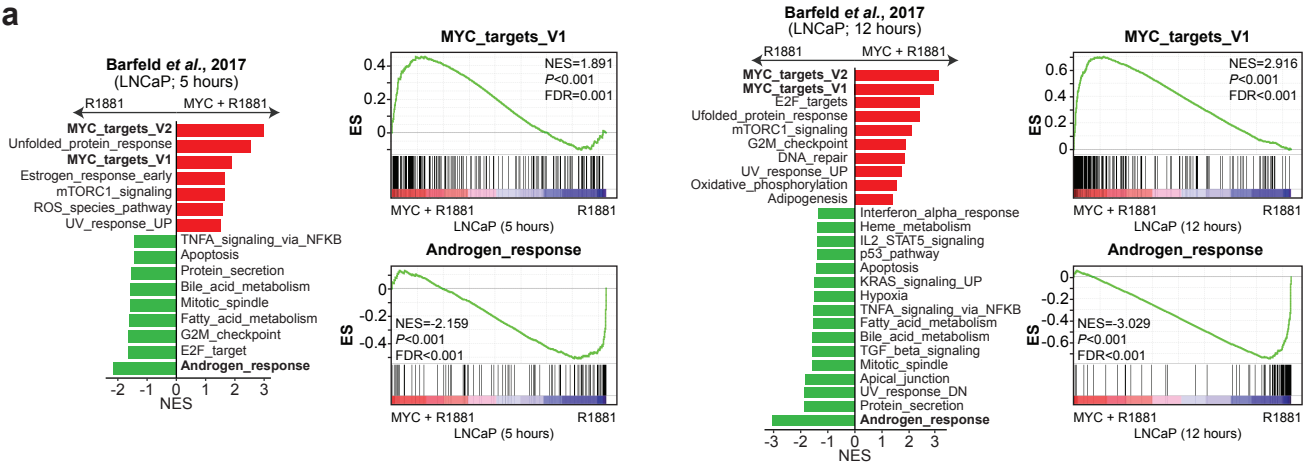**b**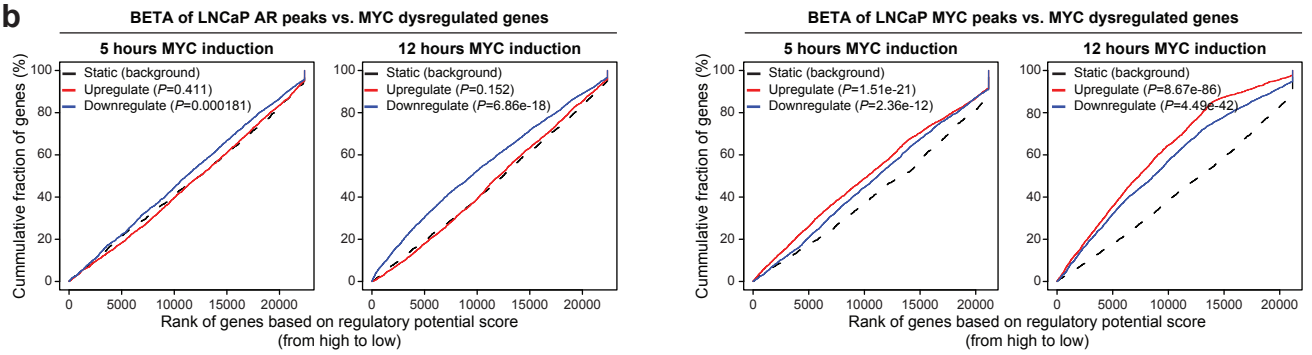**c**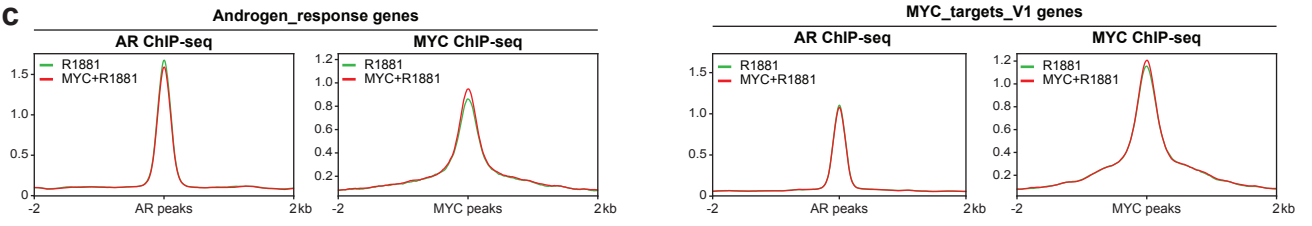**d**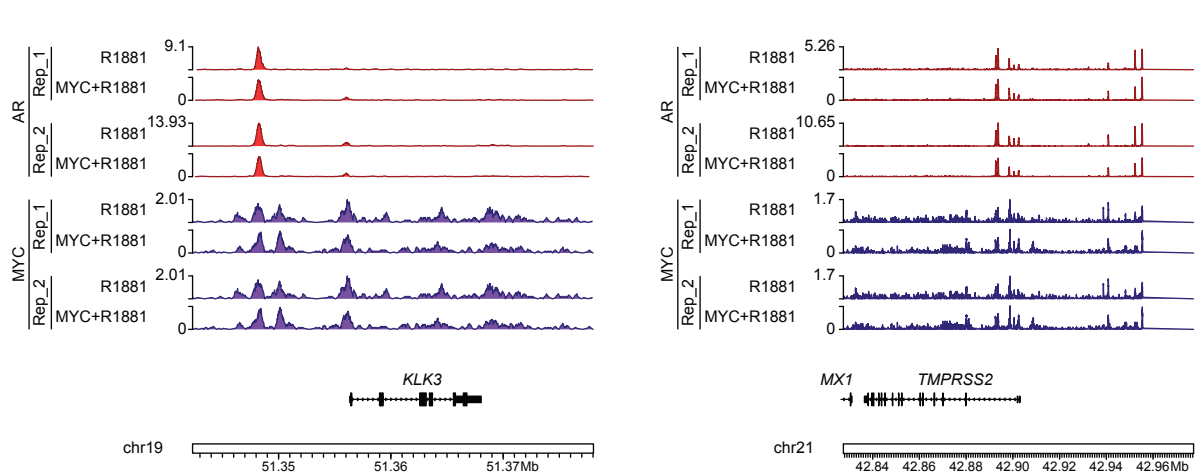

Supplementary Figure 9

**Supplementary Figure 9: MYC overexpression disrupts the AR transcriptional program in LNCaP cells.** Reanalysis of transcriptomics and epigenetics data from Barfeld and colleagues <sup>2</sup>. **(a)** Gene Set Enrichment Analysis (GSEA, Hallmark,  $P < 0.05$  and  $FDR < 0.1$ ) revealed an enriched MYC transcriptional program and a depleted AR response following 5 or 12 hours of MYC induction ( $P < 0.001$  and  $FDR < 0.001$ ; Source data are provided as a Source Data file). **(b)** BETA analysis revealed that AR binding sites are associated with gene downregulation while MYC binding sites are associated with gene upregulation following MYC induction. **(c)** AR and MYC binding nearby *Androgen\_response* and *MYC\_targets\_V1* genes is unchanged following MYC induction despite a dampened AR and a heightened MYC transcriptional program. **(d)** Unchanged AR and MYC binding at *KLK3* and *TMPRSS2* loci, AR-dependent genes downregulated by MYC overexpression. NES: normalized enrichment score; ES: enrichment score.

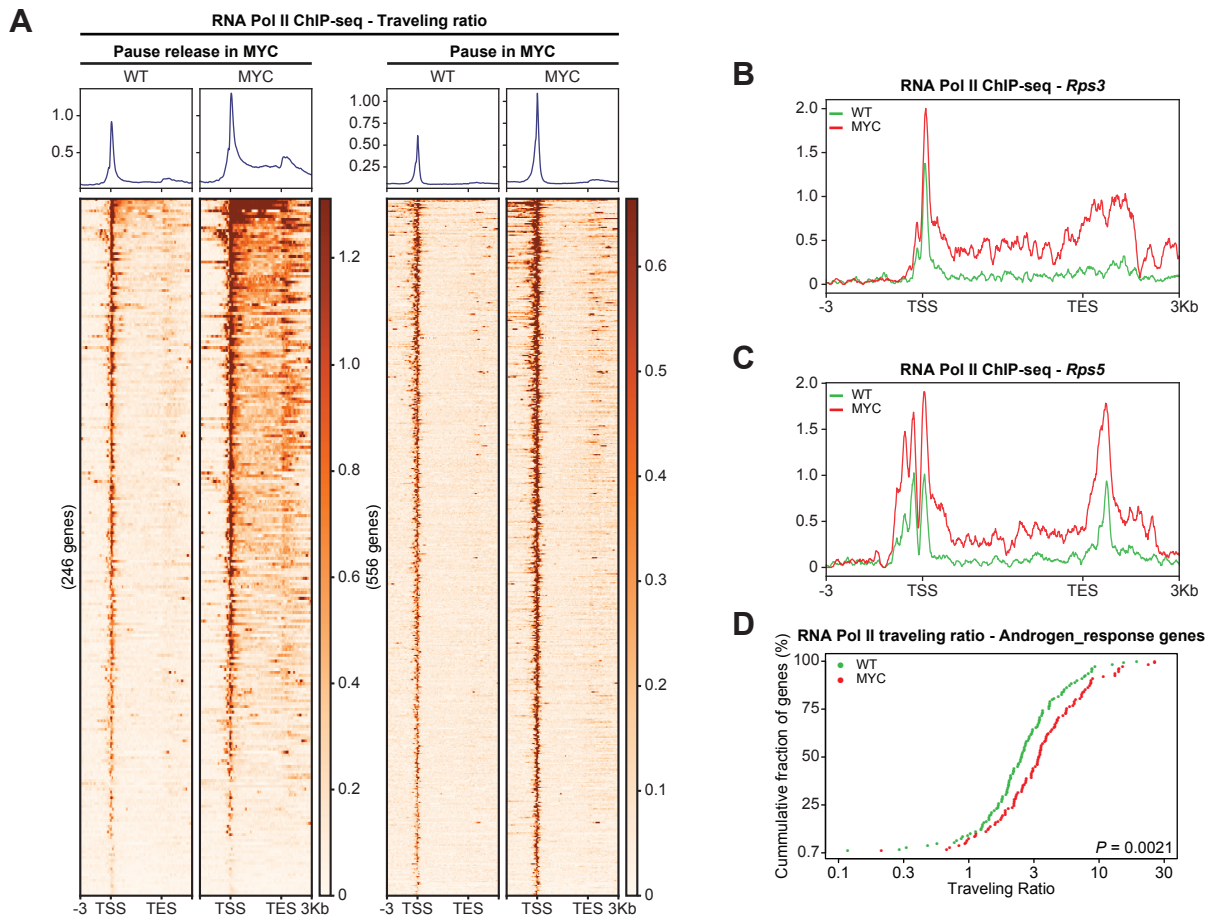

**Supplementary Figure 10: RNA Pol II promoter-proximal pausing.** (a) RNA Pol II occupancy at pause release (*left*) and pause genes (*right*) following MYC overexpression (VP;  $n = 2$  pools of biological replicates ( $n = 8-13$ ) per genotype). (b, c) Pause release at *Rps3* (b) and *Rps6* (c) MYC\_targets\_V1 genes (VP;  $n = 2$  pools of biological replicates ( $n = 8-13$ ) per genotype). (d) RNA Pol II traveling ratio reveals greater promoter-proximal pausing at Androgen\_response genes (non-smoothed curves. TSS: transcription start site; TES: transcription end site).

## SUPPLEMENTARY REFERENCES

- 1 Spratt, D. E. *et al.* Individual Patient-Level Meta-Analysis of the Performance of the Decipher Genomic Classifier in High-Risk Men After Prostatectomy to Predict Development of Metastatic Disease. *J Clin Oncol* **35**, 1991-1998, doi:10.1200/JCO.2016.70.2811 (2017).
- 2 Barfeld, S. J. *et al.* c-Myc Antagonises the Transcriptional Activity of the Androgen Receptor in Prostate Cancer Affecting Key Gene Networks. *EBioMedicine* **18**, 83-93, doi:10.1016/j.ebiom.2017.04.006 (2017).
