# Supplementary material for: MYC drives aggressive prostate cancer by disrupting transcriptional pause release at androgen receptor targets
Source: PubMed Central journal article supplement (PMC9106722; doi:10.1038/s41467-022-30257-z), 2022-05-13
Supplement: 41467_2022_30257_MOESM3_ESM.pdf [file 41467_2022_30257_MOESM3_ESM.pdf]

## Reporting Summary

Nature Research wishes to improve the reproducibility of the work that we publish. This form provides structure for consistency and transparency in reporting. For further information on Nature Research policies, see our [Editorial Policies](#) and the [Editorial Policy Checklist](#).

### Statistics

For all statistical analyses, confirm that the following items are present in the figure legend, table legend, main text, or Methods section.

n/a Confirmed

- The exact sample size ( $n$ ) for each experimental group/condition, given as a discrete number and unit of measurement
- A statement on whether measurements were taken from distinct samples or whether the same sample was measured repeatedly
- The statistical test(s) used AND whether they are one- or two-sided  
*Only common tests should be described solely by name; describe more complex techniques in the Methods section.*
- A description of all covariates tested
- A description of any assumptions or corrections, such as tests of normality and adjustment for multiple comparisons
- A full description of the statistical parameters including central tendency (e.g. means) or other basic estimates (e.g. regression coefficient) AND variation (e.g. standard deviation) or associated estimates of uncertainty (e.g. confidence intervals)
- For null hypothesis testing, the test statistic (e.g.  $F$ ,  $t$ ,  $r$ ) with confidence intervals, effect sizes, degrees of freedom and  $P$  value noted  
*Give  $P$  values as exact values whenever suitable.*
- For Bayesian analysis, information on the choice of priors and Markov chain Monte Carlo settings
- For hierarchical and complex designs, identification of the appropriate level for tests and full reporting of outcomes
- Estimates of effect sizes (e.g. Cohen's  $d$ , Pearson's  $r$ ), indicating how they were calculated

*Our web collection on [statistics for biologists](#) contains articles on many of the points above.*

### Software and code

Policy information about [availability of computer code](#)

Data collection

Raw Illumina output was converted to fastq format using Illumina Bcl2fastq v2.18.

Data analysis

ChiLin v2.0 (<http://cistrome.org/chilin/>) for ChIP-seq QC; BWA v0.7.17-r1188 (<http://bio-bwa.sourceforge.net/>) for mapping; MACS2 v2.1.1.20160309 (<http://liulab.dfci.harvard.edu/MACS/>) for peak calling; DESeq2 v1.18.1 (<https://bioconductor.org/packages/release/bioc/html/DESeq2.html>) for differential peak analysis; HOMER v3.0.0 (<http://homer.ucsd.edu/homer/motif/>) for motif enrichment analysis; 10x Cell Ranger v2.0.0 (<https://support.10xgenomics.com/single-cell-gene-expression/software/downloads/latest>) for preprocessing scRNAdata; GSEA v4.1.0 (<http://www.gsea-msigdb.org/gsea/downloads.jsp>) for pathway analysis; Slingshot v1.3.1 (<https://github.com/kstreet13/slingshot>) for Pseudotime inference; VIPER v2.0 (<https://bitbucket.org/cfce/viper/src/master/>) for read alignment, quality control and data analysis; STAR v2.7.0f (<https://github.com/alexdobin/STAR>) for RNA-seq read mapping; Cufflinks v2.2.1 (<http://cole-trapnell-lab.github.io/cufflinks/>) for RNA-seq readcounts; SVA v.3.18.00 for scRNA-seq and RNA-seq batch effects removal; CoBRA v2.0 (<https://cfce-cobra.readthedocs.io/>) for ChIP-seq sample-sample correlation and differential peaks analysis; deepTools v2.3.5 (<https://deeptools.readthedocs.io/>) for ChIP-seq profiling; BETA v1.0.7 (<http://cistrome.org/BETA/>) integrate ChIP-seq and gene expression.

The following R packages were used: Seurat (v3.1.1) for scRNA-seq unsupervised clustering; ggplot2 (v3.3.2) for visualization; stats (v3.6.0) for covariance analysis; ComplexHeatmap (v2.2.0) for heatmap visualization; karyoploteR (v1.12.4) for ChIP-seq profile visualization; Bioconductor TCGAbiolinks (v2.14.1) for retrieving RNA-seq readcounts and clinical data from TCGA; singscore (v1.6.0) for generation of transcriptional signature scores; maxstat (v0.7-25) for defining cut-off point of transcriptional signature scores; survival (v3.2-3) for performing survival analysis; survminer (v0.4.8) for plotting Kaplan-Meier; scan.upc (v2.28.0) for normalizing microarray expression levels.

For manuscripts utilizing custom algorithms or software that are central to the research but not yet described in published literature, software must be made available to editors and reviewers. We strongly encourage code deposition in a community repository (e.g. GitHub). See the Nature Research [guidelines for submitting code & software](#) for further information.

## Data

Policy information about [availability of data](#)

All manuscripts must include a [data availability statement](#). This statement should provide the following information, where applicable:

- Accession codes, unique identifiers, or web links for publicly available datasets
- A list of figures that have associated raw data
- A description of any restrictions on data availability

The murine (bulk RNA-seq, scRNA-seq and ChIP-seq) and LuCaP PDXs (ChIP-seq) sequencing data reported in this paper were deposited on NCBI Gene Expression Omnibus (GEO) and are accessible through GEO Series accession number GSE163146 (<https://www.ncbi.nlm.nih.gov/geo/query/acc.cgi?acc=GSE163146>) and GSE163220 (<https://www.ncbi.nlm.nih.gov/geo/query/acc.cgi?acc=GSE163220>), respectively. The CRPC (bulk RNA-seq) and the LNCaP MYC model (microarray and ChIP-seq) publicly available data used in this study are available through GEO Series accession number GSE126078 (<https://www.ncbi.nlm.nih.gov/geo/query/acc.cgi?acc=GSE126078>) and GSE73995 (<https://www.ncbi.nlm.nih.gov/geo/query/acc.cgi?acc=GSE73995>), respectively. The remaining data are available within the Article, Supplementary Information or Source Data file provided with this paper.

## Field-specific reporting

Please select the one below that is the best fit for your research. If you are not sure, read the appropriate sections before making your selection.

- Life sciences       Behavioural & social sciences       Ecological, evolutionary & environmental sciences

For a reference copy of the document with all sections, see [nature.com/documents/nr-reporting-summary-flat.pdf](https://www.nature.com/documents/nr-reporting-summary-flat.pdf)

## Life sciences study design

All studies must disclose on these points even when the disclosure is negative.

|                 |                                                                                                                                                                                                                                                                                                                                                                                                                                                                                                                                                                                                                                                                                                                                                                                                                                                                                                                                                                                                                                                                                          |
|-----------------|------------------------------------------------------------------------------------------------------------------------------------------------------------------------------------------------------------------------------------------------------------------------------------------------------------------------------------------------------------------------------------------------------------------------------------------------------------------------------------------------------------------------------------------------------------------------------------------------------------------------------------------------------------------------------------------------------------------------------------------------------------------------------------------------------------------------------------------------------------------------------------------------------------------------------------------------------------------------------------------------------------------------------------------------------------------------------------------|
| Sample size     | Sample size for scRNA-seq was estimated empirically for sufficient statistical power based on literature. Sample size for RNA-seq and ChIP-seq was determined based on previous analyses (Labbé et al., Nature Communications, 2019) demonstrating ample sample sizes for identifying transcriptomic and cistromic changes.                                                                                                                                                                                                                                                                                                                                                                                                                                                                                                                                                                                                                                                                                                                                                              |
| Data exclusions | No data were excluded from the analysis.                                                                                                                                                                                                                                                                                                                                                                                                                                                                                                                                                                                                                                                                                                                                                                                                                                                                                                                                                                                                                                                 |
| Replication     | VP, DPL and AP biospecimens for scRNA-seq were harvested from a single WT or Hi-MYC mouse. The impact of MYC overexpression on the Androgen_response was replicated using data from Barfeld et al., Labrecque et al. and the LuCaP PDXs series. Protein expression in VP was assessed from three biological independent biospecimens. The murine ChIP-seq analyses reported comparing genotype conditions uses two pools of biological replicates comprised of at least 8 samples each harvested from distinct mice and key results were replicated using data from Barfeld et al. and the LuCaP PDXs series. Number of independent samples is clearly stated in the manuscript.<br>The combination of the Hallmark Androgen_response / Hallmark MYC_targets_V1 and AR-A / Hallmark MYC_targets_V1 signatures and their association with prostate cancer progression was examined (and replicated) in the META855 cohort using the thresholds obtained from quantiles defined in the TCGA dataset (discovery cohort). This finding was also replicated in a mCRPC cohort (Abida et al.). |
| Randomization   | Randomization was not relevant to this study because comparisons were across distinct conditions.                                                                                                                                                                                                                                                                                                                                                                                                                                                                                                                                                                                                                                                                                                                                                                                                                                                                                                                                                                                        |
| Blinding        | Histopathological slides were analysed by expert murine uropathologist, who were blind to the experimental conditions. Investigators were blind to the results obtained from the discovery cohort (TCGA) for the validation analysis (META855 cohort). All other experiments were performed in a non-blind fashion in order to perform comparisons across distinct conditions or because of the laboratory structure making blinding impractical.                                                                                                                                                                                                                                                                                                                                                                                                                                                                                                                                                                                                                                        |

## Reporting for specific materials, systems and methods

We require information from authors about some types of materials, experimental systems and methods used in many studies. Here, indicate whether each material, system or method listed is relevant to your study. If you are not sure if a list item applies to your research, read the appropriate section before selecting a response.

### Materials & experimental systems

| n/a                                 | Involved in the study                                           |
|-------------------------------------|-----------------------------------------------------------------|
| <input type="checkbox"/>            | <input checked="" type="checkbox"/> Antibodies                  |
| <input checked="" type="checkbox"/> | <input type="checkbox"/> Eukaryotic cell lines                  |
| <input checked="" type="checkbox"/> | <input type="checkbox"/> Palaeontology and archaeology          |
| <input type="checkbox"/>            | <input checked="" type="checkbox"/> Animals and other organisms |
| <input type="checkbox"/>            | <input checked="" type="checkbox"/> Human research participants |
| <input checked="" type="checkbox"/> | <input type="checkbox"/> Clinical data                          |
| <input checked="" type="checkbox"/> | <input type="checkbox"/> Dual use research of concern           |

### Methods

| n/a                                 | Involved in the study                           |
|-------------------------------------|-------------------------------------------------|
| <input type="checkbox"/>            | <input checked="" type="checkbox"/> ChIP-seq    |
| <input checked="" type="checkbox"/> | <input type="checkbox"/> Flow cytometry         |
| <input checked="" type="checkbox"/> | <input type="checkbox"/> MRI-based neuroimaging |

## Antibodies

|                 |                                                                                                                                                                                                                                                                                                                                                                                                                                                                                                                                                                                                                                                                                                                                                                                                                                                                                                                                                                                                                                                                                                                                                                                                                                                                                                                                                                                                                                                                                                                                                                                                                                                                                                                                                                                                                                                                                                                                                                                                                                                                                                                                                                                                                                                                                                                                                                                                                                                                                                                                                                                                                                                                                                                                                                     |
|-----------------|---------------------------------------------------------------------------------------------------------------------------------------------------------------------------------------------------------------------------------------------------------------------------------------------------------------------------------------------------------------------------------------------------------------------------------------------------------------------------------------------------------------------------------------------------------------------------------------------------------------------------------------------------------------------------------------------------------------------------------------------------------------------------------------------------------------------------------------------------------------------------------------------------------------------------------------------------------------------------------------------------------------------------------------------------------------------------------------------------------------------------------------------------------------------------------------------------------------------------------------------------------------------------------------------------------------------------------------------------------------------------------------------------------------------------------------------------------------------------------------------------------------------------------------------------------------------------------------------------------------------------------------------------------------------------------------------------------------------------------------------------------------------------------------------------------------------------------------------------------------------------------------------------------------------------------------------------------------------------------------------------------------------------------------------------------------------------------------------------------------------------------------------------------------------------------------------------------------------------------------------------------------------------------------------------------------------------------------------------------------------------------------------------------------------------------------------------------------------------------------------------------------------------------------------------------------------------------------------------------------------------------------------------------------------------------------------------------------------------------------------------------------------|
| Antibodies used | <p>We have used only commercial commercially available antibodies. List of antibodies used:</p> <ol style="list-style-type: none"> <li>1) anti-AR: #ab108341, Abcam;</li> <li>2) anti-AR: N-20; #sc-816, Santa Cruz Biotechnology;</li> <li>3) anti-c-MYC: #ab32072, Abcam;</li> <li>4) anti-beta-Actin: #4967, Cell Signaling Technology;</li> <li>5) anti-FOXA1: #ab23738, Abcam;</li> <li>6) anti-H3K27ac: #ab4729, Abcam;</li> <li>7) anti-H3K27ac: #C15410196, Diagenode;</li> <li>8) anti-RNA Pol II: #sc899, Santa Cruz Biotechnology;</li> <li>9) anti-AR: #MU256-UC, Biogenex;</li> <li>10) anti-synaptophysin: #sc-17750, Santa Cruz Biotechnology.</li> </ol>                                                                                                                                                                                                                                                                                                                                                                                                                                                                                                                                                                                                                                                                                                                                                                                                                                                                                                                                                                                                                                                                                                                                                                                                                                                                                                                                                                                                                                                                                                                                                                                                                                                                                                                                                                                                                                                                                                                                                                                                                                                                                            |
| Validation      | <p>All the antibodies are widely published and have quality control tested per the company's standard procedure:</p> <ol style="list-style-type: none"> <li>1) anti-AR: #ab108341 [ER179(2)], Abcam (reference - PMID 34417459; product datasheet - <a href="https://www.abcam.com/androgen-receptor-antibody-er1792-chip-grade-ab108341.html">https://www.abcam.com/androgen-receptor-antibody-er1792-chip-grade-ab108341.html</a>);</li> <li>2) anti-AR: N-20; #sc-816, Santa Cruz Biotechnology (reference - PMID 26457646; product datasheet - <a href="https://www.scbt.com/scbt/product/ar-antibody-n-20">https://www.scbt.com/scbt/product/ar-antibody-n-20</a>);</li> <li>3) anti-c-MYC: #ab32072 [Y69], Abcam (reference - PMID 31554818; product datasheet - <a href="https://www.abcam.com/c-myc-antibody-y69-ab32072.html">https://www.abcam.com/c-myc-antibody-y69-ab32072.html</a>);</li> <li>4) anti-beta-Actin: #4967, Cell Signaling Technology (reference - PMID 31554818; product datasheet - <a href="https://www.cellsignal.com/products/primary-antibodies/b-actin-antibody/4967">https://www.cellsignal.com/products/primary-antibodies/b-actin-antibody/4967</a>);</li> <li>5) anti-FOXA1: #ab23738, Abcam (reference - PMID 26457646; product datasheet - <a href="https://www.abcam.com/foxa1-antibody-chip-grade-ab23738.pdf">https://www.abcam.com/foxa1-antibody-chip-grade-ab23738.pdf</a>);</li> <li>6) anti-H3K27ac: #ab4729, Abcam (reference - PMID 33750801 product datasheet - <a href="https://www.abcam.com/histone-h3-acetyl-k27-antibody-chip-grade-ab4729.html">https://www.abcam.com/histone-h3-acetyl-k27-antibody-chip-grade-ab4729.html</a>);</li> <li>7) anti-H3K27ac: #C15410196, Diagenode (reference - PMID 30773341; product datasheet - <a href="https://www.diagenode.com/en/p/h3k27ac-polyclonal-antibody-premium-50-mg-18-ml#">https://www.diagenode.com/en/p/h3k27ac-polyclonal-antibody-premium-50-mg-18-ml#</a>);</li> <li>8) anti-RNA Pol II: #sc899, Santa Cruz Biotechnology (reference - PMID 20434984; product datasheet - <a href="https://datasheets.scbt.com/sc-899.pdf">https://datasheets.scbt.com/sc-899.pdf</a>);</li> <li>9) anti-AR: #MU256-UC [F39.4.1], Biogenex (reference - PMID 31361600; product datasheet - <a href="http://store.biogenex.com/us/applications/ihc/controls/controls/anti-androgen-receptor-clone-f39-4-1.html">http://store.biogenex.com/us/applications/ihc/controls/controls/anti-androgen-receptor-clone-f39-4-1.html</a>);</li> <li>10) anti-synaptophysin: #sc-17750 [D-4], Santa Cruz Biotechnology (reference - PMID 31361600; product datasheet - <a href="https://www.scbt.com/p/syp-antibody-d-4">https://www.scbt.com/p/syp-antibody-d-4</a>).</li> </ol> |

## Animals and other organisms

Policy information about [studies involving animals](#); [ARRIVE guidelines](#) recommended for reporting animal research

|                         |                                                                                                                                                                                                                                                                                                                                                                                                                                                         |
|-------------------------|---------------------------------------------------------------------------------------------------------------------------------------------------------------------------------------------------------------------------------------------------------------------------------------------------------------------------------------------------------------------------------------------------------------------------------------------------------|
| Laboratory animals      | FVB Hi-MYC (strain number 01XK8), expressing the human c-MYC transgene in prostatic epithelium (heterozygous for MYC transgene), were obtained from the National Cancer Institute Mouse Repository at Frederick National Laboratory for Cancer Research. Hi-MYC mice were bred with wild-type FVB mice to obtain male wild-type and Hi-MYC mice to be used for this research. At 12 weeks of age, male mice were euthanized and tissues were collected. |
| Wild animals            | No wild animals were used in this study.                                                                                                                                                                                                                                                                                                                                                                                                                |
| Field-collected samples | No field collected samples were used in the study.                                                                                                                                                                                                                                                                                                                                                                                                      |
| Ethics oversight        | The animal protocol (#13-049) was reviewed and approved by the Dana-Farber Cancer Institute Institutional Animal Care and Use Committee (IACUC), and was in accordance with the Animal Welfare Act. The animal protocol (#2017-7961) also followed the ethical guidelines of the Canadian Council on Animal Care, and was approved by the Research Institute of the McGill University Health Centre Glen Facility Animal Care Committee (FACC).         |

Note that full information on the approval of the study protocol must also be provided in the manuscript.

## Human research participants

Policy information about [studies involving human research participants](#)

|                            |                                                                                                                                                                                                                                                                                                                                                                                                                                                                                                                                                               |
|----------------------------|---------------------------------------------------------------------------------------------------------------------------------------------------------------------------------------------------------------------------------------------------------------------------------------------------------------------------------------------------------------------------------------------------------------------------------------------------------------------------------------------------------------------------------------------------------------|
| Population characteristics | Informed consent was obtained to collect human mCRPC tissues and generate the patient-derived xenograft tumors as described previously (Labrecque et al., J Clin Oncol, 2017; Nguyen et al., Prostate, 2017). The study was approved by the University of Washington Human Subjects Division Institutional Review Board (no. 2341). All patients were males with advanced prostate cancer that received androgen ablation therapy. Age at diagnosis was captured as well as the source of the tissue.                                                         |
| Recruitment                | Patients were approached and enrolled in the prostate cancer donor program by their oncologist at the University of Washington. After confirming consent with the patient and/or the immediate family of a patient with advanced disease, tumor specimens were collected after death. While efforts to recruit minority patients are ongoing, the patient population at the University of Washington and the Seattle catchment area for the program are predominantly white. This leads to a selection bias towards white patients within the patient cohort. |

Note that full information on the approval of the study protocol must also be provided in the manuscript.

## ChIP-seq

### Data deposition

Confirm that both raw and final processed data have been deposited in a public database such as [GEO](#).

Confirm that you have deposited or provided access to graph files (e.g. BED files) for the called peaks.

Data access links

*May remain private before publication.*

GSE163146; <https://www.ncbi.nlm.nih.gov/geo/query/acc.cgi?acc=GSE163146>

GSE163220; <https://www.ncbi.nlm.nih.gov/geo/query/acc.cgi?acc=GSE163220>

Files in database submission

fastq and bigWig files for the following ChIP-Seq samples were deposited in the Gene Expression Omnibus, they can be accessed using the link above:

GSM4972719 FOXA1\_WT\_1  
 GSM4972720 FOXA1\_WT\_2  
 GSM4972721 FOXA1\_MYC\_1  
 GSM4972722 FOXA1\_MYC\_2  
 GSM4972723 AR\_WT\_1  
 GSM4972724 AR\_WT\_2  
 GSM4972725 AR\_MYC\_1  
 GSM4972726 AR\_MYC\_2  
 GSM4972727 H3K27ac\_WT\_1  
 GSM4972728 H3K27ac\_WT\_2  
 GSM4972729 H3K27ac\_MYC\_1  
 GSM4972730 H3K27ac\_MYC\_2  
 GSM4972731 Pol2\_WT\_1  
 GSM4972732 Pol2\_WT\_2  
 GSM4972733 Pol2\_MYC\_1  
 GSM4972734 Pol2\_MYC\_2  
 GSM4975226 AR\_105CR  
 GSM4975227 AR\_136CR  
 GSM4975228 AR\_147CR  
 GSM4975229 AR\_167CR  
 GSM4975230 AR\_70CR  
 GSM4975231 AR\_78CR  
 GSM4975232 AR\_81CR  
 GSM4975233 AR\_96CR  
 GSM4975234 FOX\_105CR  
 GSM4975235 FOX\_136CR  
 GSM4975236 FOX\_147CR  
 GSM4975237 FOX\_167CR  
 GSM4975238 FOX\_70CR  
 GSM4975239 FOX\_78CR  
 GSM4975240 FOX\_81CR  
 GSM4975241 FOX\_96CR  
 GSM4975242 K27ac\_105CR  
 GSM4975243 K27ac\_136CR  
 GSM4975244 K27ac\_147CR  
 GSM4975245 K27ac\_167CR  
 GSM4975246 K27ac\_70CR  
 GSM4975247 K27ac\_78CR  
 GSM4975248 K27ac\_81CR  
 GSM4975249 K27ac\_96CR

Genome browser session

(e.g. [UCSC](#))

<http://genome.ucsc.edu/cgi-bin/hgTracks?db=mm9&hubUrl=https://data.cyverse.org/dav-anon/iplant/home/dfcancer/trackhub/hub.txt>

### Methodology

Replicates

Merged two pools of biological replicates each comprised of multiple samples harvested from distinct 12-week-old mice:

WT Pool #1 (12 mice) and Pool #2 (13 mice);

MYC Pool #3 (8 mice) and Pool #4 (8 mice).

Sequencing depth

All ChIP-Seq samples were single-end sequenced, the raw and mapped read number for each are below:

Sample Name Raw Reads Mapped Reads

AR\_MYC\_1 34269574 32910932  
 AR\_MYC\_2 85071572 81362447  
 AR\_WT\_1 58293707 55870686  
 AR\_WT\_2 52273701 50212995  
 FOXA1\_MYC\_1 45771664 45072170  
 FOXA1\_MYC\_2 50567597 49897725  
 FOXA1\_WT\_1 53339419 52656581  
 FOXA1\_WT\_2 53246498 52409357  
 H3K27ac\_MYC\_1 49957249 48541056  
 H3K27ac\_MYC\_2 61726803 60260267  
 H3K27ac\_WT\_1 54053305 52413951  
 H3K27ac\_WT\_2 50419559 49289837  
 Pol2\_MYC\_1 87184435 84359846  
 Pol2\_MYC\_2 72349486 69274722  
 Pol2\_WT\_1 69606185 68054299  
 Pol2\_WT\_2 64600151 62714578  
 AR\_105CR 20012067 19143950  
 AR\_136CR 20010423 18179250  
 AR\_147CR 20015887 15954896  
 AR\_167CR 20012805 17868349  
 AR\_70CR 20010201 17458893  
 AR\_78CR 20011251 17615152  
 AR\_81CR 20012482 16627634  
 AR\_96CR 20009516 19603244  
 FOX\_105CR 20008295 16522341  
 FOX\_136CR 20009033 17944989  
 FOX\_147CR 20009040 16999179  
 FOX\_167CR 20013152 18380360  
 FOX\_70CR 20009210 17635278  
 FOX\_78CR 20278702 16673554  
 FOX\_81CR 20010827 18375494  
 FOX\_96CR 20010311 16492714  
 K27ac\_105CR 20008342 17477192  
 K27ac\_136CR 20010902 18542759  
 K27ac\_147CR 20009922 16245965  
 K27ac\_167CR 20010108 18632729  
 K27ac\_70CR 20009970 18287088  
 K27ac\_78CR 20011916 17652472  
 K27ac\_81CR 20011698 16457565  
 K27ac\_96CR 20011149 15902411

## Antibodies

Murine ChIP-seq:  
 AR: #ab108341, Abcam (lot #GR139151-3)  
 FOXA1: #ab23738, Abcam (lot #GR176970-1)  
 H3K27ac: #ab4729, Abcam (lot #GR167929-1)  
 RNA Pol II: #sc899, Santa Cruz Biotechnology (lot #H1114)  
 LuCaP PDXs ChIP-seq:  
 AR: N-20; #sc-816, Santa Cruz Biotechnology  
 FOXA1: #ab23738, Abcam  
 H3K27ac: #C15410196, Diagenode

## Peak calling parameters

Peak calling is used the Model-Based Analysis of ChIP-seq 2 (MACS v2.1.1.20160309), with a q-value (FDR) threshold of 0.01.

## Data quality

We evaluated multiple quality control criteria based on alignment information and peak quality: (i) sequence quality score; (ii) uniquely mappable reads (reads that can only map to one location in the genome); (iii) uniquely mappable locations (locations that can only be mapped by at least one read); (iv) peak overlap with Velcro regions, a comprehensive set of locations – also called consensus signal artifact regions – in the genome that have anomalous, unstructured high signal or read counts in next-generation sequencing experiments independent of cell line and of type of experiment; (v) number of total peaks (the minimum required was 1,000); (vi) high-confidence peaks (the number of peaks that are tenfold enriched over background); (vii) percentage overlap with known DHS sites derived from the ENCODE Project (the minimum required to meet the threshold was 80%); and (viii) peak conservation (a measure of sequence similarity across species based on the hypothesis that conserved sequences are more likely to be functional).

## Software

ChILin(<http://cistrome.org/chilin/>) for QC; BWA(<http://bio-bwa.sourceforge.net/>) for mapping; MACS2(<http://liulab.dfci.harvard.edu/MACS/>) for peak calling.
